# Supplementary material
Source: MDPI journal article supplement (https://www.mdpi.com/2073-4344/10/3/344)
Supplement: s1 [file s1]

# SUPPLEMENTARY MATERIAL

## Degradation of meropenem by heterogeneous photocatalysis using TiO<sub>2</sub>/fiberglass substrates

Alejandro Altamirano Briones<sup>1</sup>, Iván Córdor Guevara<sup>1</sup>, David Mena<sup>2</sup>, Isabel Espinoza<sup>2</sup>, Christian Sandoval-Pauker<sup>4</sup>, Luis Ramos Guerrero<sup>1,3</sup>, Paul Vargas Jentzsch<sup>2,\*</sup> and Florinella Muñoz Bisesti<sup>2</sup>

<sup>1</sup> Departamento de Ciencias de la Tierra y la Construcción, Universidad de las Fuerzas Armadas - ESPE, Av. Gral. Rumiñahui s/n, 171103 Sangolquí, Ecuador

<sup>2</sup> Departamento de Ciencias Nucleares, Escuela Politécnica Nacional, Ladrón de Guevara E11-253, 170525 Quito, Ecuador.

<sup>3</sup> Centro de Investigación de Alimentos\_CIAL, Universidad UTE, Av. Mariscal Sucre y Mariana de Jesús, 170527 Quito, Ecuador.

<sup>4</sup> Laboratorio de Fisicoquímica, Departamento de Química, Universidad Técnica Federico Santa María, Avenida España 1680, 2390123 Valparaíso, Chile.

### CONTENTS

**Figure S1.** a) Fiberglass disc before impregnation b) prepared TiO<sub>2</sub>/fiberglass substrate

**Table S1.** Average content of TiO<sub>2</sub> immobilized on the fiberglass substrates

**Figure S2.** SEM images of the TiO<sub>2</sub>/fiberglass substrate. The size of some agglomerates of TiO<sub>2</sub> immobilized on fiberglass is reported

**Figure S3.** Point of zero charge of the TiO<sub>2</sub>/fiberglass substrate

**Figure S4.** Statistical analysis of the effect of the pH value on the pseudo-first order rate constant of the photocatalytic degradation meropenem

**Figure S5.** Statistical analysis of the effect of the reuse of the TiO<sub>2</sub>/fiberglass substrate on the removal of MER after 60 min of reaction (pH = 5.7)

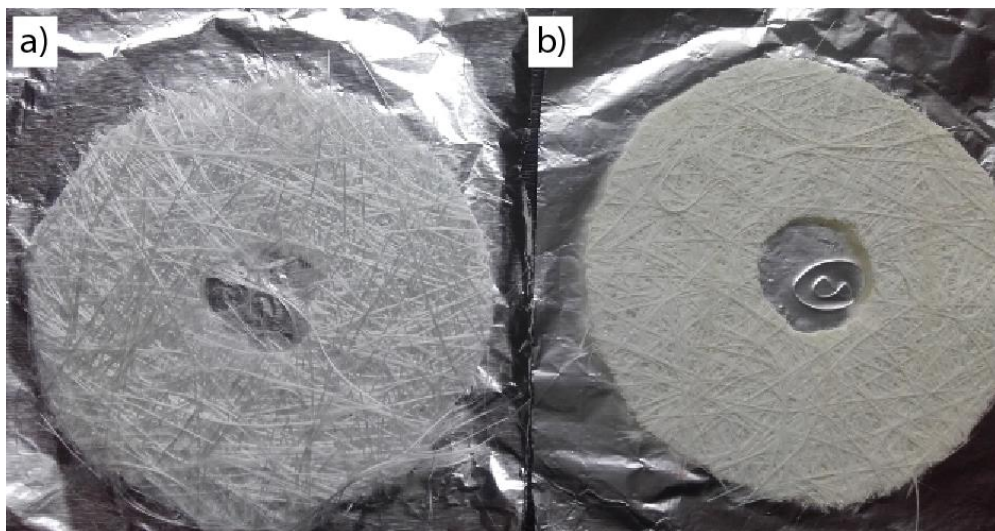

**Figure S1.** a) Fiberglass disc before immobilization b) TiO<sub>2</sub>/fiberglass substrate

#### Average content of TiO<sub>2</sub> immobilized on the fiberglass substrates

The average content of TiO<sub>2</sub> on each substrate was determined by a gravimetric analysis. For this, the initial weight of the cleaned fiberglass discs was measured. After the immobilization procedure, the plates were dried at 100 °C for 24 h, after this step, the weight of the substrates was measured again. For the calculation of the content of TiO<sub>2</sub>, it was assumed that TiO<sub>2</sub>, silicon and ethanol were homogeneously distributed in the suspension during the immobilization. As a result, the silicon/TiO<sub>2</sub> mass ratio right after the immobilizations was 3.0. Nevertheless, after the drying process, the silicon/TiO<sub>2</sub> mass ratio changed because of the loss of volatile compounds from the silicon mixture. For this reason, a correction was introduced considering a silicon<sub>(dry)</sub>/silicon<sub>(wet)</sub> mass ratio of 0.206 ± 0.02 determined in a separate gravimetric analysis. The area of the substrates (47.1 cm<sup>2</sup>) was calculated considering the internal and external diameters of the discs. Gravimetric data was measured for 115 substrates, and the average results are presented on Table S1.

**Table S1.** Average content of TiO<sub>2</sub> immobilized on the fiberglass substrates

|                             | Initial weight<br>(g) | Final weight<br>(g) | TiO <sub>2</sub> and dry silicon<br>immobilized<br>(g) | *TiO <sub>2</sub><br>immobilized<br>(mg/cm <sup>2</sup> ) |
|-----------------------------|-----------------------|---------------------|--------------------------------------------------------|-----------------------------------------------------------|
| <b>Average**</b>            | 1.8857                | 2.0503              | 0.1645                                                 | 2.1578                                                    |
| <b>Standard deviation**</b> | 0.1573                | 0.1661              | 0.0253                                                 | 0.3319                                                    |

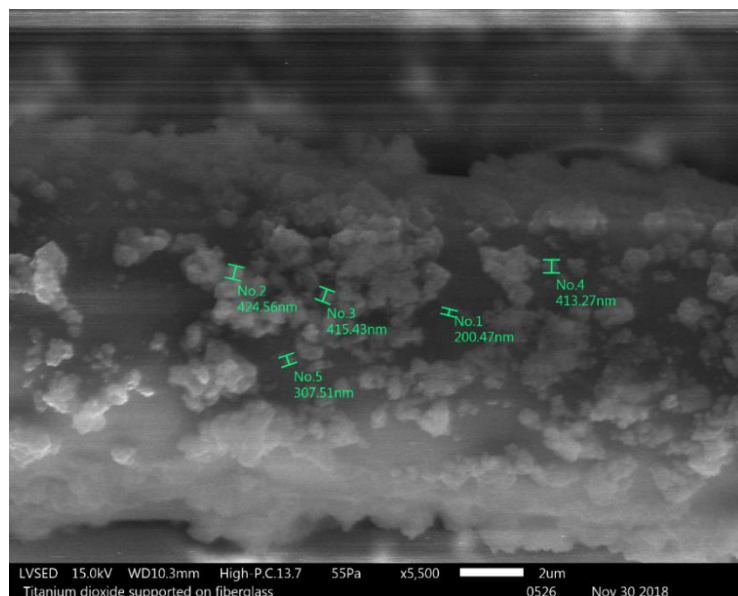

**Figure S2.** SEM images of the  $\text{TiO}_2$ /fiberglass substrate. The size of some agglomerates of  $\text{TiO}_2$  immobilized on fiberglass is reported

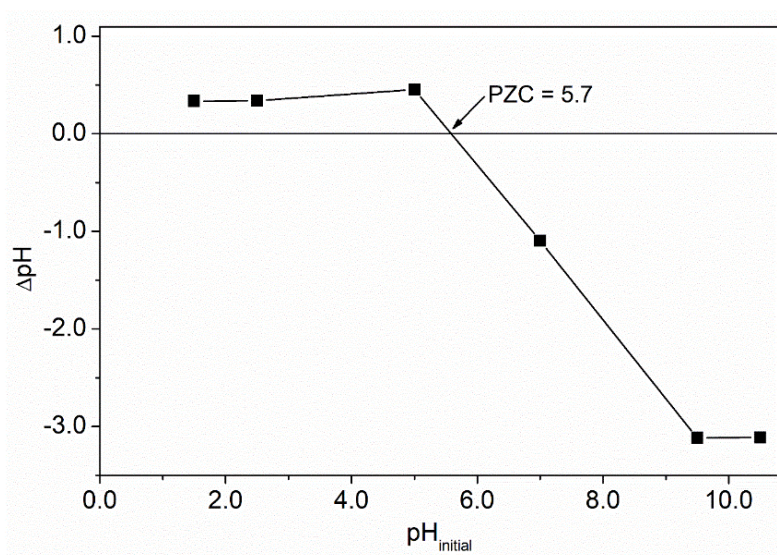

**Figure S3.** Point of zero charge of the  $\text{TiO}_2$ /fiberglass substrate

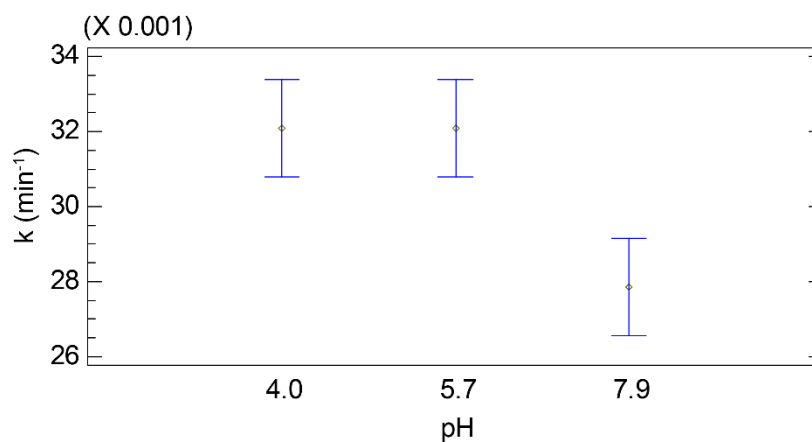

**Figure S4.** Statistical analysis of the effect of the pH value on the pseudo-first order rate constant of the photocatalytic degradation meropenem

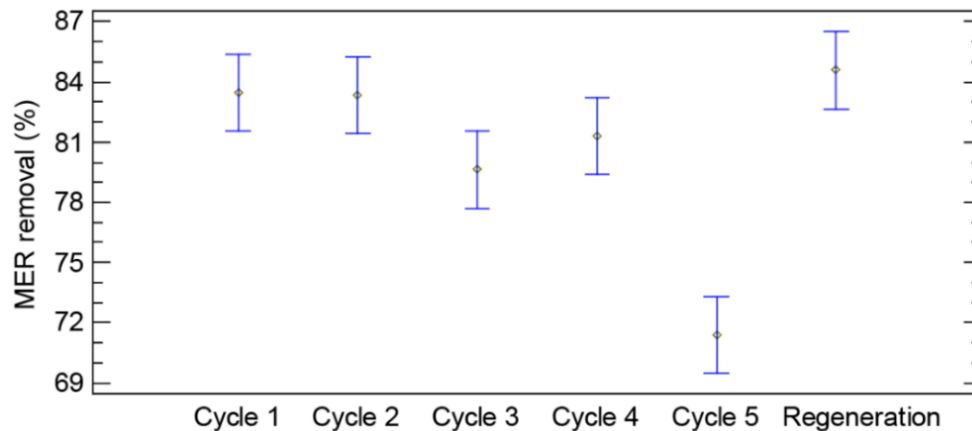

**Figure S5.** Statistical analysis of the effect of the reuse of the TiO<sub>2</sub>/fiberglass substrate on the removal of MER after 60 min of reaction (pH = 5.7)
